# Supplementary material for: Releasing the brakes of tumor immunity with anti-PD-L1 and pushing its accelerator with L19–IL2 cures poorly immunogenic tumors when combined with radiotherapy
Source: HighWire-hosted journal article supplement (doi:10.1136/jitc-2020-001764), 2021-03-01
Supplement: jitc-2020-001764supp003_data_supplement.pdf [file jitc-2020-001764supp003_data_supplement.pdf]

## Supplementary Figure 2

A

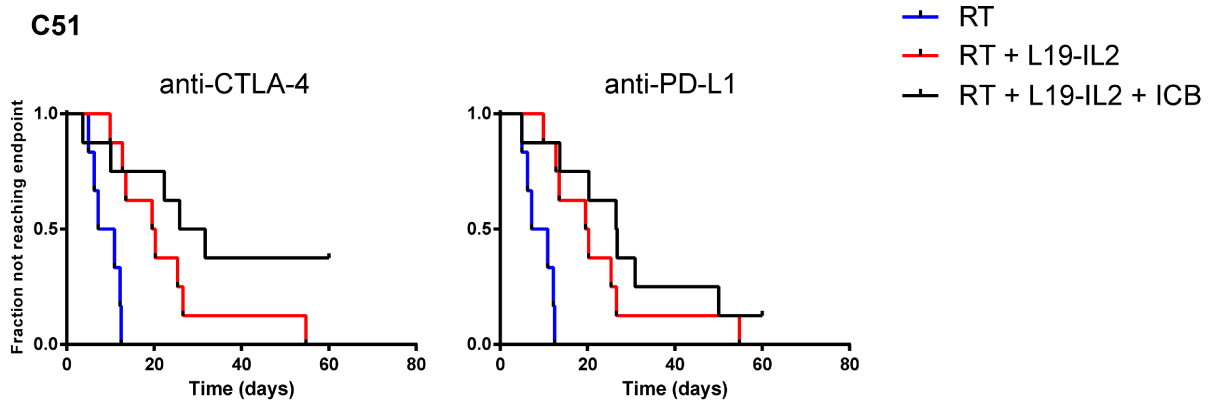

B

| Tumor      | Hazard ratio [95% CI] (p-value)                |                                       |                                         |
|------------|------------------------------------------------|---------------------------------------|-----------------------------------------|
|            | 2-sided p-value vs. control, i.e. RT + L19-IL2 |                                       |                                         |
|            | -                                              | RT + L19-IL2 + anti-PD-L1             | RT + L19-IL2 + anti-CTLA-4              |
| <b>C51</b> | -                                              | 0.63<br>[0.22;1.75]<br>(0.37)         | 0.41 [0.13;1.29]<br>(0.13)              |
|            | *2-sided p-value vs. control, i.e. RT          |                                       |                                         |
|            | RT + L19-IL2                                   | RT + L19-IL2 + anti-PD-L1             | RT + L19-IL2 + anti-CTLA-4              |
| <b>C51</b> | <b>0.2</b><br>[0.05;0.68]<br>(0.01)            | <b>0.12</b><br>[0.03;0.46]<br>(0.002) | <b>0.08</b><br>[0.02;0.34]<br>(<0.0005) |

Significant HR and p values are shown in bold. \*2-sided p-value vs. control, i.e. RT + L19-IL2. \*\*2-sided p-value vs. control, i.e. RT.
