# Supplementary material for: Releasing the brakes of tumor immunity with anti-PD-L1 and pushing its accelerator with L19–IL2 cures poorly immunogenic tumors when combined with radiotherapy
Source: HighWire-hosted journal article supplement (doi:10.1136/jitc-2020-001764), 2021-03-01

## Supplementary Figure 5

A

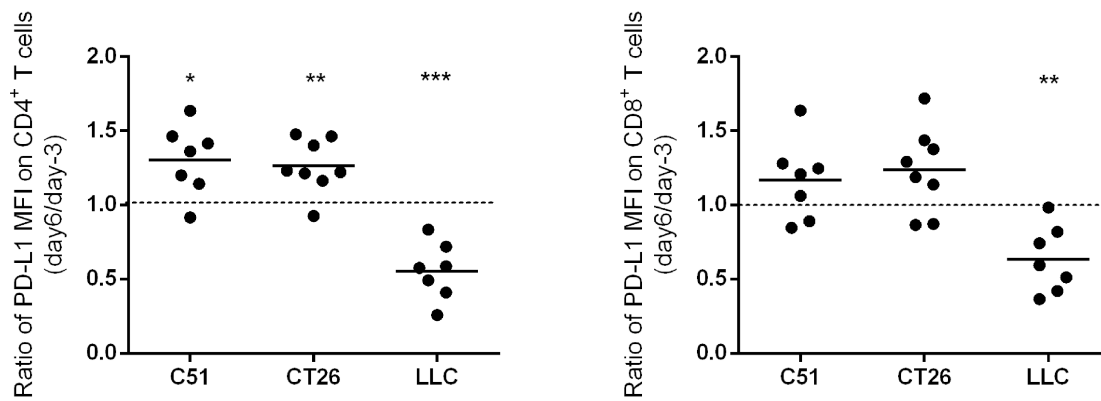

B

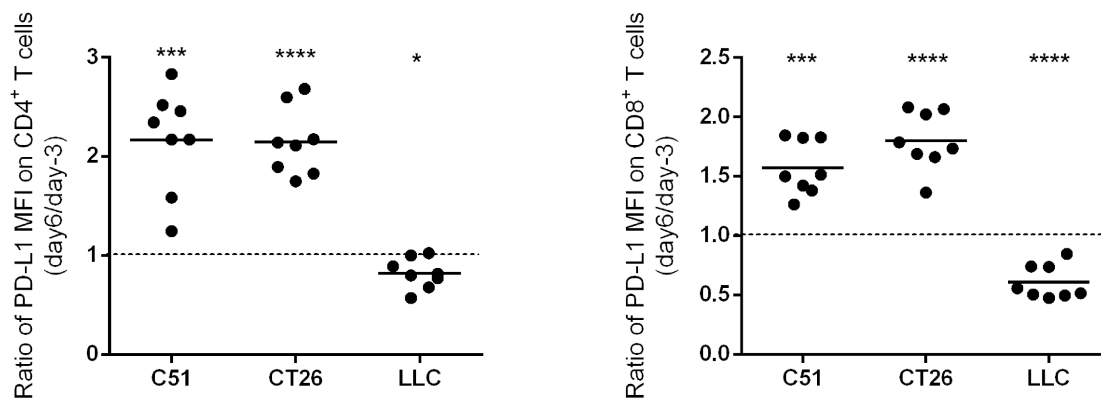

C

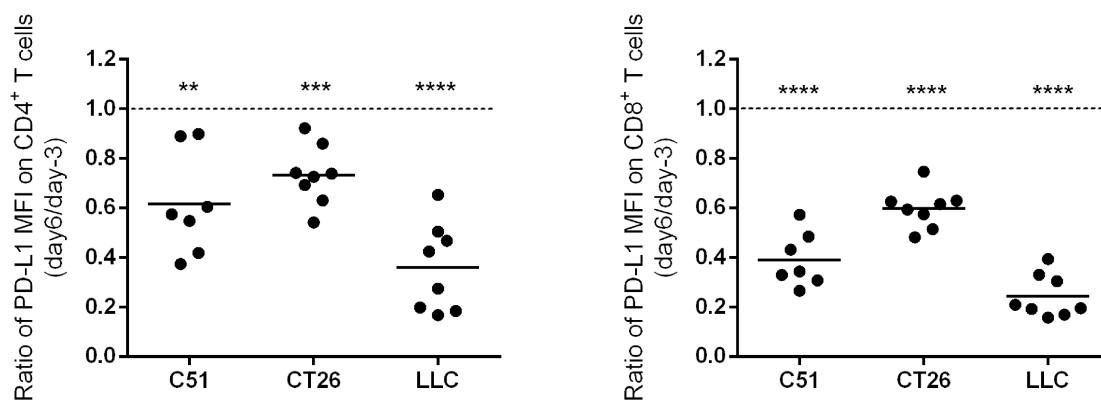

Supplement: jitc-2020-001764supp007_data_supplement.pdf [file jitc-2020-001764supp007_data_supplement.pdf]
